# Supplementary material for: Acupotomy versus acupuncture for cervical spondylotic radiculopathy: protocol of a systematic review and meta-analysis
Source: PubMed Central journal article supplement — BMJ Open. 2019 Aug 8;9(8):e029052. doi: 10.1136/bmjopen-2019-029052 (PMC6701683; doi:10.1136/bmjopen-2019-029052), 2019-08-08
Supplement: bmjopen-2019-029052.draft_revisions.pdf [file bmjopen-2019-029052.draft_revisions.pdf]

# BMJ Open

BMJ Open is committed to open peer review. As part of this commitment we make the peer review history of every article we publish publicly available.

When an article is published we post the peer reviewers' comments and the authors' responses online. We also post the versions of the paper that were used during peer review. These are the versions that the peer review comments apply to.

The versions of the paper that follow are the versions that were submitted during the peer review process. They are not the versions of record or the final published versions. They should not be cited or distributed as the published version of this manuscript.

BMJ Open is an open access journal and the full, final, typeset and author-corrected version of record of the manuscript is available on our site with no access controls, subscription charges or pay-per-view fees (<http://bmjopen.bmj.com>).

If you have any questions on BMJ Open's open peer review process please email [info.bmjopen@bmj.com](mailto:info.bmjopen@bmj.com)

# BMJ Open

## Acupotomy versus acupuncture for cervical spondylotic radiculopathy: protocol of a systematic review and meta-analysis

|                               |                                                                                                                                                                                                                                                                                                                                                                                                                                                                                                                                                                                                                                                                  |
|-------------------------------|------------------------------------------------------------------------------------------------------------------------------------------------------------------------------------------------------------------------------------------------------------------------------------------------------------------------------------------------------------------------------------------------------------------------------------------------------------------------------------------------------------------------------------------------------------------------------------------------------------------------------------------------------------------|
| Journal:                      | <i>BMJ Open</i>                                                                                                                                                                                                                                                                                                                                                                                                                                                                                                                                                                                                                                                  |
| Manuscript ID                 | bmjopen-2019-029052                                                                                                                                                                                                                                                                                                                                                                                                                                                                                                                                                                                                                                              |
| Article Type:                 | Protocol                                                                                                                                                                                                                                                                                                                                                                                                                                                                                                                                                                                                                                                         |
| Date Submitted by the Author: | 10-Jan-2019                                                                                                                                                                                                                                                                                                                                                                                                                                                                                                                                                                                                                                                      |
| Complete List of Authors:     | Chen, Bin; The Affiliated People's Hospital of Fujian University of Traditional Chinese Medicine, Department of Rehabilitation<br>Zhang, Cai; Fujian University of Traditional Chinese Medicine<br>Zhang, Ren-pan ; Fujian University of Traditional Chinese Medicine<br>Lin, An-yang; Fujian University of Traditional Chinese Medicine<br>Xiu, Zhong-biao; The Affiliated People's Hospital of Fujian University of Traditional Chinese Medicine<br>Liu, Jing; The Affiliated People's Hospital of Fujian University of Traditional Chinese Medicine<br>Zhao, Hong-jia ; The Affiliated People's Hospital of Fujian University of Traditional Chinese Medicine |
| Keywords:                     | acupotomy, acupuncture, cervical spondylotic radiculopathy, protocol, systematic review, meta-analysis                                                                                                                                                                                                                                                                                                                                                                                                                                                                                                                                                           |
|                               |                                                                                                                                                                                                                                                                                                                                                                                                                                                                                                                                                                                                                                                                  |

SCHOLARONE™  
Manuscripts

## Acupotomy versus acupuncture for cervical spondylotic radiculopathy: protocol of a systematic review and meta-analysis

Bin Chen<sup>1</sup>, Cai Zhang<sup>2</sup>, Ren-Pan Zhang<sup>1,2</sup>, An-Yang Lin<sup>1,2</sup>, Zhong-Biao Xiu<sup>1</sup>,  
Jing Liu<sup>1</sup>, Hong-Jia Zhao<sup>1</sup> #

(1. Department of Rehabilitation, The Affiliated People's Hospital of Fujian University of Traditional Chinese Medicine, Fuzhou 350004, Fujian Province, China.

2. Fujian University of Traditional Chinese Medicine, Fuzhou 350122, Fujian Province, China.)

### Abstract

**Introduction:** Cervical spondylotic radiculopathy (CSR) is the most common pattern of cervical spondylosis, which is a serious and common degenerative disease. Both acupotomy and acupuncture have been widely used clinically to treat CSR in China with satisfied efficacy. However, there is no systematic review comparing the effectiveness of these two therapies. The aim of this study is to compare the therapeutic efficacy and safety between acupotomy and acupuncture for CSR patients to provide evidence for clinical practice.

**Methods and analysis:** The following electronic databases will be searched: Web of Science, PubMed, Embase, Cochrane Library, China Knowledge Network Database (CNKI), China Biomedical Literature Database (CBM), Wanfang Database and Chinese Scientific Journal Database (VIP). The randomized controlled trials of acupotomy versus acupuncture with/without additional treatment for CSR will be searched in the databases from their inception to December 2018 by 2 researchers independently. The total effective rate and curative rate will be assessed as the primary outcomes. Visual analog scale and symptom score will be assessed as the secondary outcome. The Review Manager 5.3 will be used for meta-analysis and the evidence level will be assessed by using the method for Grading of Recommendations Assessment, Development, and Evaluation (GRADE). Continuous outcomes will be presented as the weighted mean difference (WMD) or standardized mean difference (SMD) with 95% confidence interval (CI), while dichotomous data will be expressed as relative risk (RR) with 95% CI. If the included studies have existing heterogeneity

1  
2  
3  
4 ( $P<0.05$ ), a random-effects model will be used. Otherwise, we will calculate using a  
5 fixed effects model.  
6

7 **Results:** This systematic review and meta-analysis will use high-quality  
8 evidence-based medicine to compare the efficacy and safety between acupotomy and  
9 acupuncture in CSR.  
10  
11

12 **Conclusion:** The result will provide clear evidence to determine whether acupotomy  
13 therapy is an effective and safe intervention for patients with CSR.  
14  
15  
16

### 17 **Strengths and limitations of this study**

- 18 • This systematic review will comprehensively compare the therapeutic efficacy  
19 and safety between acupotomy and acupuncture for cervical spondylotic  
20 radiculopathy.
- 21 • The study screening, data extraction and quality assessment will be performed by  
22 two independent reviewers.
- 23 • Different types of acupuncture and some of the reviewed trials with small sample  
24 sizes may cause considerable heterogeneity in this review. High- quality trials might  
25 be deficient to generate convincing conclusions.  
26  
27  
28  
29  
30  
31  
32  
33  
34  
35  
36  
37

38 **Abbreviations:** CSR = Cervical spondylotic radiculopathy, CBM = China  
39 Biomedical Literature Database, CNKI = China National Knowledge Infrastructure,  
40 VIP = China Science and Technology Journal Database, RCTs = randomized  
41 controlled trials, VAS = Visual analog scale, GRADE = Grading of  
42 Recommendations Assessment, Development, and Evaluation, WMD = weighted  
43 mean difference, SMD = standardized mean difference, CI = confidence interval, RR  
44 = relative risk, PRISMA-P = Preferred Reporting Items for Systematic Reviews and  
45 Meta-analyses Protocols, NSAIDs = nonsteroidal anti-inflammatory drugs,  
46  
47  
48  
49  
50  
51  
52  
53  
54  
55

56 **Keywords:** acupotomy, acupuncture, cervical spondylotic radiculopathy, protocol,  
57 systematic review, meta-analysis  
58  
59  
60

1  
2  
3  
4 # Corresponding authors

5 Prof. Hongjia Zhao:

6  
7 Tel: (+86) 0591 86252627;

8  
9 Fax: (+86) 0591 86252627;

10  
11 Email: hongjiafz@163.com  
12  
13  
14  
15  
16  
17  
18  
19  
20  
21  
22  
23  
24  
25  
26  
27  
28  
29  
30  
31  
32  
33  
34  
35  
36  
37  
38  
39  
40  
41  
42  
43  
44  
45  
46  
47  
48  
49  
50  
51  
52  
53  
54  
55  
56  
57  
58  
59  
60

For peer review only

## 1. Introduction

Cervical spondylotic radiculopathy (CSR) is the most common pattern of cervical spondylosis, which is a serious and common degenerative disease in both middle aged and elderly populations. CSR, accounting for about 60 to 70 % of all cervical spondylosis, is also the common and frequently-occurring disease in clinic<sup>[1]</sup>. Due to social technology advances, lifestyle changes and the increase in staff members, the incidence of CSR tends to increase and the onset age of the patient gets younger year by year, which has seriously affected the patients' physical health and quality of life.

Many therapeutic interventions have been applied for the treatment of CSR, including nonsteroidal anti-inflammatory drugs (NSAIDs)<sup>[2]</sup>, epidural steroid injections<sup>[3]</sup>, acupuncture<sup>[4]</sup>, physical therapy<sup>[5]</sup>, and exercises<sup>[6, 7]</sup>. In clinical practice, acupotomy has also been widely used to treat cervical spondylosis, lumbar disc herniation, knee osteoarthritis and other diseases in China with satisfied efficacy, because of its effectiveness and low risk of complications<sup>[8-12]</sup>.

Acupotomy, also named needle-knife, originates from the "nine classical of needles" in Huang Di Nei Jing (*Huangdi's Internal Classic*) and was developed in China in 1976 by Zhu Hanzhang<sup>[13]</sup>. Acupotomy therapy is considered a minimally invasive surgery that uses traditional Chinese medicine and combines Chinese acupuncture therapy and modern surgical principles<sup>[14]</sup>. In the treatment of CSR, the role of acupotomy is to remove attached tissues, recover the dynamic function of soft tissues, relieve nerve pressure, and promote Qi-blood circulation to ameliorate pain and numbness symptoms with a flat-head bladed needle<sup>[10, 15]</sup>.

Acupotomy has the characteristics of both acupuncture and microinvasive operation. Therefore, both acupotomy and acupuncture are commonly used in treating similar conditions, especially CSR. However, there is no systematic review comparing the effectiveness of these two therapies in patients with CSR. It is worthy to critically review the evidence of the comparison of these two therapies to inform clinical practice. Herein, the aim of this study is to compare the therapeutic efficacy and

1  
2  
3  
4 safety between acupotomy and acupuncture on CSR to provide evidence for clinical  
5  
6 practice.  
7  
8

## 9 10 **2. Methods**

### 11 **2.1. Design and registration of the review**

12  
13 This systematic review and meta-analysis protocol was registered in PROSPERO  
14 (CRD42019117348) at <https://www.crd.york.ac.uk/PROSPERO/#myprospero> and  
15 developed following the guideline of Preferred Reporting Items for Systematic  
16 Reviews and Meta-analyses Protocols (PRISMA-P) 2015 [16].  
17  
18

### 19 **2.2. Inclusion criteria for study selection**

#### 20 **2.2.1. Type of study.**

21  
22 We will estimate the research literature according to the criteria of the review  
23 objectives and participants, interventions, comparisons, outcomes (PICO).  
24 Randomized controlled trials (RCTs), comparing acupotomy against any form of  
25 acupuncture with/without additional treatment, will be included in this systematic  
26 review. Moreover, blinding will not be considered because of the characteristics of  
27 acupuncture and acupotomy treatment. Additionally, the language of the publications  
28 will be limited to Chinese and English.  
29  
30

#### 31 **2.2.2. Types of participants.**

32  
33 Patients of any gender or age or race or nationality with CSR received acupotomy or  
34 acupuncture therapy with/without additional treatment.  
35  
36

- 37 1. In line with diagnostic criteria of CSR.
- 38 2. Participants who have not undergone an invasive intervention.
- 39 3. No restriction on age.

40  
41 The exclusion criteria were shown as follows: (1) Ruplicated studies; (2) No definite  
42 diagnostic criteria of CSR; (3) Wrong interventions: these studies were excluded  
43 which used open surgery or acupotomy was manipulated in both groups; (4) Reviews  
44 or theory studies; (5) Animal experiments.  
45  
46

#### 47 **2.2.3. Types of interventions.**

##### 48 **Experimental interventions**

1  
2  
3  
4 The treatment group will be treated with acupotomy (with/without additional  
5 treatment). No restrictions are imposed on times of treatment, frequency of treatment,  
6 and length of treatment period.  
7  
8

### 9 **Comparator interventions**

10  
11 The treatment with several types of acupuncture (with/without same additional  
12 treatment) will be included in this review as acupuncture, manual acupuncture,  
13 auricular acupuncture, scalp acupuncture, fire needling, warm needling and  
14 electro-acupuncture etc.  
15  
16  
17  
18

#### 19 **2.2.4. Types of outcome measures.**

20  
21 The primary outcome measurements will be total effective rate and curative rate. The  
22 secondary outcome measures will include visual analog scale (VAS) and symptom  
23 score.  
24  
25  
26

### 27 **2.3. Data sources**

28  
29 The main sources of information that will be obtained in this study include electronic  
30 resource databases, trial registries, retroactive references, and different types of grey  
31 literature.  
32  
33

34  
35 The following electronic databases will be searched: Web of Science, PubMed,  
36 Embase, Cochrane Library, China Knowledge Network Database (CNKI), China  
37 Biomedical Literature Database (CBM), Wanfang Database and Chinese Scientific  
38 Journal Database (VIP). Reference lists of the relevant literature and systematic  
39 reviews, as well as the tables of contents related to acupotomy versus acupuncture on  
40 CSR will also be searched. RCTs of acupotomy versus acupuncture with/without  
41 additional treatment for CSR patients will be searched in the databases from their  
42 inception to December 2018 by two researchers independently  
43  
44  
45  
46  
47  
48  
49

#### 50 **2.4. Search strategy**

51  
52 The strategy will be created according to the Cochrane handbook guidelines. The  
53 established search strategy for PubMed was displayed, as following:  
54

55  
56 **Mesh term #1:** ((acupotomy) OR (acupotome) OR (needle knife) OR (needle  
57 scalpel)): ti, ab, kw  
58

59  
60 **Mesh term #2:** ((acupuncture) OR (manual acupuncture) OR (auricular acupuncture)



OR (scalp acupuncture) OR (fire needling) OR (warm needling) OR (electro-acupuncture)): ti, ab, kw

**Mesh term #3:** ((cervical radiculopathy) OR (cervical spondylotic radiculopathy) OR (cervical spondylopathy) OR (cervical spondylosis) OR (neck pain) OR (neck syndrome)): ti, ab, kw

**Mesh term #4:** ((clinical trials) OR (random control trials))

**#1 AND #2 AND #3 AND #4**

The equivalent search words will be used in the Chinese databases.

## **2.5. Data collection and analysis**

### **2.5.1. Selection of studies.**

The researchers will import the retrieved literature into an EndNote library and eliminate duplicate data. Two review authors (Renpan Zhang and Anyang Lin) selected studies for eligibility and checked against the inclusion criteria independently. Any disagreement will be resolved by consensus or consultation with a third independent researcher (Hongjia Zhao). The selection process is illustrated in a PRISMA flow diagram (**Figure. 1**).

### **2.5.2. Data extraction and management.**

Two review authors (Jing Liu and Zhongbiao Xiu) will independently use a standardized form for extracting data of the included articles. The following data were extracted: general information (e.g., title, authors, year and published country), details of study (e.g., design, inclusion and exclusion criteria, blinding, randomization and sample size), participant characteristics (e.g., age and number of subjects), description of interventions, types of outcomes assessed, and other detailed information. If necessary, we will contact the corresponding authors of trials as much as possible for further information.

### **2.5.3. Assessment of risk of bias and reporting of study quality.**

The Cochrane Collaboration's tool will be applied to evaluate the quality and risk of bias in ultimate included studies by two authors (Renpan Zhang and Anyang Lin) independently[17]. The risk of bias will include random sequence generation, allocation concealment, blinding, completeness of outcome data, selective outcome

1  
2  
3  
4 reporting, and other bias. The assessments for each item will be graded as low risk,  
5 unclear risk, and high risk. If there is any disagreement take place, the arbiter  
6 (Hongjia Zhao) will do the final judge.  
7

#### 8 9 **2.5.4. Measures of treatment effect.**

10  
11 Continuous outcomes will be presented as the mean difference (MD) for analysis,  
12 while dichotomous data will be expressed as relative risk (RR), both of them will be  
13 with 95% confidence intervals (CI)[18]. When the same outcome is measured in  
14 different ways, the standardized mean difference (SMD) with 95%CI will be selected  
15 to express the size of the intervention effect.  
16  
17

#### 18 19 **2.5.5. Dealing with missing data.**

20  
21 We will attempt to contact authors of included studies for missing or incomplete data  
22 by E-mail. However, If the missing data cannot be obtained, the study will be  
23 excluded from the analysis.  
24  
25

#### 26 27 **2.5.6. Assessment of heterogeneity.**

28  
29 Statistical heterogeneity will be detected by the  $I^2$  statistic and  $\chi^2$  test.  $P < 0.1$  of  $\chi^2$   
30 test or  $I^2 > 50\%$  indicates the possibility of statistical heterogeneity among the studies.  
31 If the included studies have existing heterogeneity, a random-effect model will be  
32 used. Otherwise, we will calculate using a fixed-effect model.  
33  
34

#### 35 36 **2.5.7. Assessment of reporting bias.**

37  
38 If more than 10 studies are included, visual asymmetry on the funnel plots will be  
39 used to assess the potential reporting biases. In addition, we will test asymmetry using  
40 the Harbord modified test for dichotomous outcomes and Egger test for continuous  
41 outcomes.  
42  
43

#### 44 45 **2.5.8. Data synthesis.**

46  
47 The Review Manager 5.3 will be employed for meta-analysis. When statistical  
48 heterogeneity is low among the results, the fixed-effects model will be used for the  
49 meta-analysis. However, there is considerable heterogeneity, the random-effects  
50 model will be performed to analyse the pooled effect estimates.  
51  
52

#### 53 54 **2.5.9. Subgroup analysis.**

55  
56 If there is significant heterogeneity in the included trials, we will conduct a subgroup  
57  
58  
59  
60

analysis based on the acupotomy or acupuncture interventions with/without additional treatment, types of acupuncture (acupuncture, manual acupuncture, and electro-acupuncture etc) and different outcomes.

#### **2.5.10. Sensitivity analysis.**

A sensitivity analysis will be conducted to identify whether the review conclusions are robust according to the following criteria: missing data, sample size, heterogeneity qualities, and statistical model.

#### **2.5.11. Grading the quality of evidence.**

The evidence level will be assessed by using the method for Grading of Recommendations Assessment, Development, and Evaluation (GRADE) and classified into four possible ratings: very low, low, moderate, or high.

#### **2.5.12. Patient and Public Involvement**

Patients and or public were not involved because no primary data are collected.

### **3. Discussion**

The main symptoms of CSR include neck and shoulder pain, radicular pain or numbness in the upper extremities, weakening of grip strength, and sensory disturbances. Acupotomy, containing the characteristics of both acupuncture and microinvasive operation, have been widely used clinically to treat CSR by peeling synechia, removing attached tissue, and relieve nerve pressure. Currently, there are limited evidence to determine whether acupotomy and acupuncture has similar effect on relieving pain and improving other symptoms of CSR. Therefore, the comparisons of therapeutic efficacy and safety will be made between acupotomy and acupuncture with/without same additional treatment is given to both groups. This systematic review and meta-analysis will provide high-quality evidence-based medicine to determine whether acupotomy therapy is an effective and safe intervention for patients with CSR.

#### **Author contributions**

Bin Chen and Hongjia Zhao designed the systematic review. The article was drafted

1  
2  
3  
4 by Bin Chen and Cai Zhang. Renpan Zhang, Anyang Lin, Jing Liu and Zhongbiao  
5 Xiu will independently screen the potential studies, extract the data, assess the risk of  
6 bias and finish the data synthesis. Hongjia Zhao will arbitrate any disagreement and  
7 ensure that no errors occur during the review. All review authors critically reviewed,  
8 revised, and approved the subsequent and final version of the protocol.  
9  
10  
11  
12

### 13 **Funding sources/sponsors**

14  
15 This study was funded by the National Natural Science Foundation of China (Grant  
16 NO.81804175 and 81873315) and Fujian Provincial Department of Education  
17 Applied Discipline -- Clinical Medicine "Double First Class" Construction Project.  
18  
19  
20

### 21 **Competing interests**

22  
23 None declared.  
24  
25  
26  
27  
28

29 **Conceptualization:** Ben Chen, Cai Zhang.

30  
31 **Data curation:** Ben Chen, Renpan Zhang.

32  
33 **Formal analysis:** Ben Chen, Renpan Zhang.

34  
35 **Investigation:** Anyang Lin, Zhongbiao Xiu, Jing Liu.

36  
37 **Methodology:** Ben Chen, Hongjia Zhao.

38  
39 **Project administration:** Hongjia Zhao.

40  
41 **Software:** Anyang Lin, Zhongbiao Xiu.

42  
43 **Supervision:** Hongjia Zhao, Ben Chen.

44  
45 **Validation:** Hongjia Zhao, Jing Liu.

46  
47 **Visualization:** Ben Chen.

48  
49 **Writing – original draft:** Ben Chen, Cai Zhang.

50  
51 **Writing – review & editing:** Hongjia Zhao.  
52  
53

### 54 **References**

55  
56 <http://endnote.com/downloads/style/mdpi>

57  
58 [1] Feng Y, Li WX, Zhu L, et al. Balance chiropractic therapy for cervical spondylotic radiculopathy:  
59 study protocol for a randomized controlled trial. *Trials*. 2016, 17(1): 513.  
60

- 1  
2  
3  
4 [2] Kartha S, Weisshaar CL, Philips BH, et al. Pre-treatment with Meloxicam Prevents the Spinal  
5 Inflammation and Oxidative Stress in DRG Neurons that Accompany Painful Cervical Radiculopathy.  
6 Neuroscience. 2018, 388: 393-404.  
7  
8  
9 [3] Kim EJ, Chotai S, Schneider BJ, et al. Effect of Depression on Patient-Reported Outcomes  
10 Following Cervical Epidural Steroid Injection for Degenerative Spine Disease. Pain Med. 2018.  
11  
12 [4] Wei X, Wang S, Li J, et al. Complementary and Alternative Medicine for the Management of  
13 Cervical Radiculopathy: An Overview of Systematic Reviews. Evid Based Complement Alternat Med.  
14 2015, 2015: 793649.  
15  
16 [5] Zhu L, Wei X, Wang S. Does cervical spine manipulation reduce pain in people with degenerative  
17 cervical radiculopathy? A systematic review of the evidence, and a meta-analysis. Clin Rehabil. 2016,  
18 30(2): 145-155.  
19  
20 [6] Cheng CH, Tsai LC, Chung HC, et al. Exercise training for non-operative and post-operative  
21 patient with cervical radiculopathy: a literature review. J Phys Ther Sci. 2015, 27(9): 3011-3018.  
22  
23 [7] Buyukturan B, Guclu-Gunduz A, Buyukturan O, et al. Cervical stability training with and without  
24 core stability training for patients with cervical disc herniation: A randomized, single-blind study. Eur J  
25 Pain. 2017, 21(10): 1678-1687.  
26  
27 [8] Liu F, Zhou F, Zhao M, et al. Acupotomy Therapy for Chronic Nonspecific Neck Pain: A  
28 Systematic Review and Meta-Analysis. Evid Based Complement Alternat Med. 2017, 2017: 6197308.  
29  
30 [9] Li S, Shen T, Liang Y, et al. Effects of Miniscalpel-Needle Release on Chronic Neck Pain: A  
31 Retrospective Analysis with 12-Month Follow-Up. PLoS One. 2015, 10(8): e0137033.  
32  
33 [10] Kim SY, Kim E, Kwon O, et al. Effectiveness and Safety of Acupotomy for Lumbar Disc  
34 Herniation: A Randomized, Assessor-Blinded, Controlled Pilot Study. Evid Based Complement  
35 Alternat Med. 2018, 2018: 5871657.  
36  
37 [11] Kim HJ, Jeon JH, Kim YI. Clinical Effect of Acupotomy Combined with Korean Medicine: A  
38 Case Series of a Herniated Intervertebral Disc. J Acupunct Meridian Stud. 2016, 9(1): 31-41.  
39  
40 [12] Ding Y, Wang Y, Shi X, et al. Effect of ultrasound-guided acupotomy vs electro-acupuncture on  
41 knee osteoarthritis: a randomized controlled study. J Tradit Chin Med. 2016, 36(4): 450-455.  
42  
43 [13] Jeong JK, Kim YI, Kim E, et al. Effectiveness and safety of acupotomy for treating back and/or  
44 leg pain in patients with lumbar disc herniation: A study protocol for a multicenter, randomized,  
45 controlled, clinical trial. Medicine (Baltimore). 2018, 97(34): e11951.  
46  
47  
48  
49  
50  
51  
52  
53  
54  
55  
56  
57  
58  
59  
60

- 1  
2  
3  
4 [14] Guo C, Liu N, Li X, et al. Effect of acupotomy on nitric oxide synthase and beta-endorphin in  
5 third lumbar vertebrae transverse process syndrome model rats. *J Tradit Chin Med*. 2014, 34(2):  
6 194-198.  
7  
8  
9 [15] Jiang C, Li Y, Guo M, et al. Acupotomy therapy for lumbar disc herniation: Protocol for a  
10 systematic review and meta-analysis. *Medicine (Baltimore)*. 2018, 97(40): e12624.  
11  
12 [16] Shamseer L, Moher D, Clarke M, et al. Preferred reporting items for systematic review and  
13 meta-analysis protocols (PRISMA-P) 2015: elaboration and explanation. *BMJ*. 2015, 350: g7647.  
14  
15 [17] Wang S, Yang H, Zhang J, et al. Efficacy and safety assessment of acupuncture and nimodipine to  
16 treat mild cognitive impairment after cerebral infarction: a randomized controlled trial. *BMC*  
17 *Complement Altern Med*. 2016, 16: 361.  
18  
19 [18] Ye Y, Xiao LY, Liu YH, et al. Acupuncture for patients with vascular dementia: a systematic  
20 review protocol. *BMJ Open*. 2017, 7(12): e019066.  
21  
22  
23  
24  
25  
26  
27  
28  
29  
30  
31  
32  
33  
34  
35  
36  
37  
38  
39  
40  
41  
42  
43  
44  
45  
46  
47  
48  
49  
50  
51  
52  
53  
54  
55  
56  
57  
58  
59  
60

1  
2  
3  
4  
5  
6  
7  
8  
9  
10  
11  
12  
13  
14  
15  
16  
17  
18  
19  
20  
21  
22  
23  
24  
25  
26  
27  
28  
29  
30  
31  
32  
33  
34  
35  
36  
37  
38  
39  
40  
41  
42  
43  
44  
45  
46  
47  
48  
49  
50  
51  
52  
53  
54  
55  
56  
57  
58  
59  
60

**Figure Legends**

**Figure 1.** PRISMA flow diagram of study process

For peer review only

1  
2  
3  
4  
5  
6  
7  
8  
9  
10  
11  
12  
13  
14  
15  
16  
17  
18  
19  
20  
21  
22  
23  
24  
25  
26  
27  
28  
29  
30  
31  
32  
33  
34  
35  
36  
37  
38  
39  
40  
41  
42  
43  
44  
45  
46  
47  
48  
49  
50  
51  
52  
53  
54  
55  
56  
57  
58  
59  
60

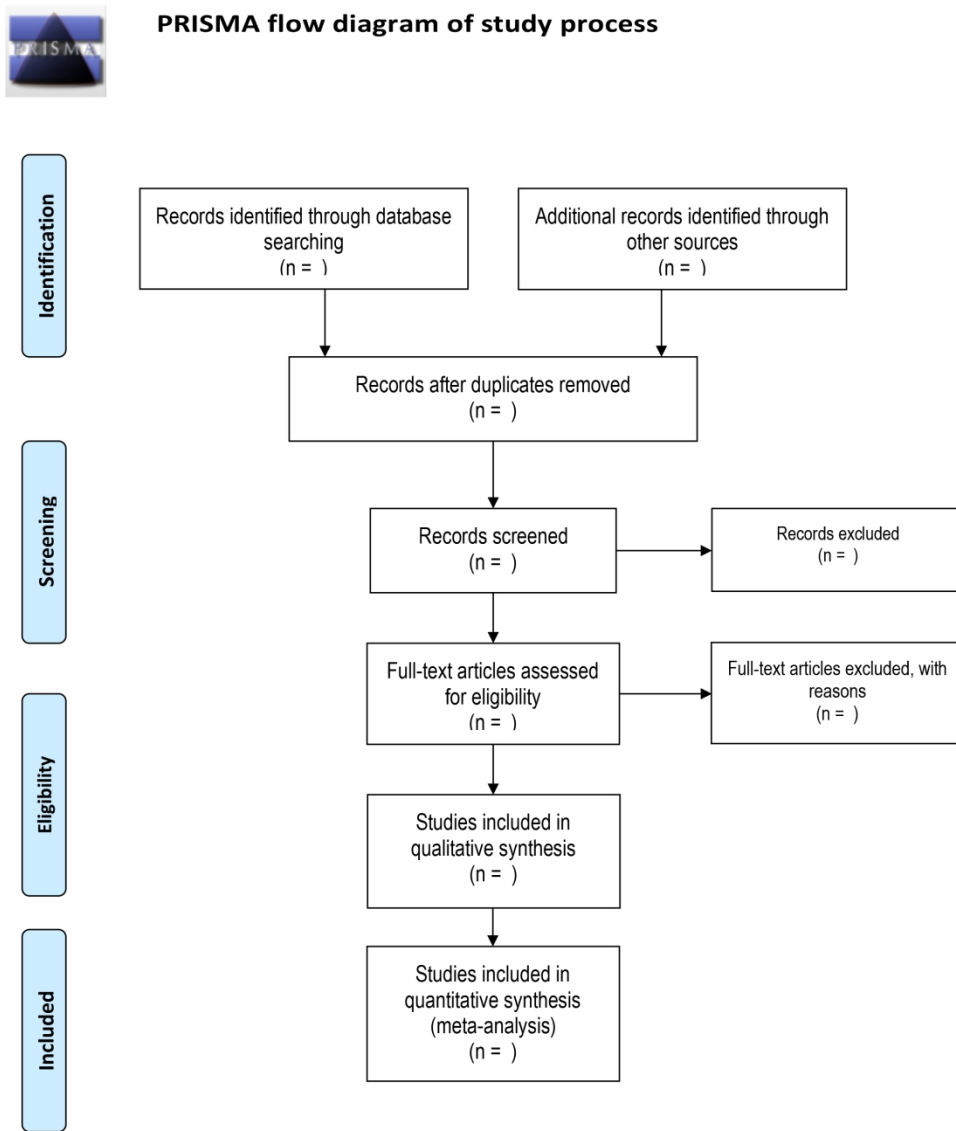

Figure 1. PRISMA flow diagram of study process

188x225mm (300 x 300 DPI)



# BMJ Open

## Acupotomy versus acupuncture for cervical spondylotic radiculopathy: protocol of a systematic review and meta-analysis

|                                 |                                                                                                                                                                                                                                                                                                                                                                                                                                                                                                                                                                                                                                                                  |
|---------------------------------|------------------------------------------------------------------------------------------------------------------------------------------------------------------------------------------------------------------------------------------------------------------------------------------------------------------------------------------------------------------------------------------------------------------------------------------------------------------------------------------------------------------------------------------------------------------------------------------------------------------------------------------------------------------|
| Journal:                        | <i>BMJ Open</i>                                                                                                                                                                                                                                                                                                                                                                                                                                                                                                                                                                                                                                                  |
| Manuscript ID                   | bmjopen-2019-029052.R1                                                                                                                                                                                                                                                                                                                                                                                                                                                                                                                                                                                                                                           |
| Article Type:                   | Protocol                                                                                                                                                                                                                                                                                                                                                                                                                                                                                                                                                                                                                                                         |
| Date Submitted by the Author:   | 05-Apr-2019                                                                                                                                                                                                                                                                                                                                                                                                                                                                                                                                                                                                                                                      |
| Complete List of Authors:       | Chen, Bin; The Affiliated People's Hospital of Fujian University of Traditional Chinese Medicine, Department of Rehabilitation<br>Zhang, Cai; Fujian University of Traditional Chinese Medicine<br>Zhang, Ren-pan ; Fujian University of Traditional Chinese Medicine<br>Lin, An-yang; Fujian University of Traditional Chinese Medicine<br>Xiu, Zhong-biao; The Affiliated People's Hospital of Fujian University of Traditional Chinese Medicine<br>Liu, Jing; The Affiliated People's Hospital of Fujian University of Traditional Chinese Medicine<br>Zhao, Hong-jia ; The Affiliated People's Hospital of Fujian University of Traditional Chinese Medicine |
| <b>Primary Subject Heading</b>: | Complementary medicine                                                                                                                                                                                                                                                                                                                                                                                                                                                                                                                                                                                                                                           |
| Secondary Subject Heading:      | Rehabilitation medicine                                                                                                                                                                                                                                                                                                                                                                                                                                                                                                                                                                                                                                          |
| Keywords:                       | acupotomy, acupuncture, cervical spondylotic radiculopathy, protocol, systematic review, meta-analysis                                                                                                                                                                                                                                                                                                                                                                                                                                                                                                                                                           |
|                                 |                                                                                                                                                                                                                                                                                                                                                                                                                                                                                                                                                                                                                                                                  |

SCHOLARONE™  
Manuscripts

1  
2  
3  
4 **Acupotomy versus acupuncture for cervical spondylotic radiculopathy: protocol**  
5  
6 **of a systematic review and meta-analysis**

7 Bin Chen<sup>1</sup>, Cai Zhang<sup>2</sup>, Ren-Pan Zhang<sup>1,2</sup>, An-Yang Lin<sup>1,2</sup>, Zhong-Biao Xiu<sup>1</sup>,  
8  
9 Jing Liu<sup>1</sup>, Hong-Jia Zhao<sup>1</sup> #

10  
11 (1. Department of Rehabilitation, The Affiliated People's Hospital of Fujian  
12 University of Traditional Chinese Medicine, Fuzhou 350004, Fujian Province, China.

13  
14  
15 2. Fujian University of Traditional Chinese Medicine, Fuzhou 350122, Fujian  
16 Province, China.)

17  
18  
19 **Abstract**

20  
21 **Introduction:** Cervical spondylotic radiculopathy (CSR) is the most common pattern  
22 of cervical spondylosis, which is a serious and common degenerative disease. Both  
23 acupotomy and acupuncture have been widely used clinically to treat CSR in China  
24 with satisfied efficacy. However, there is no systematic review comparing the  
25 effectiveness of these two therapies. The aim of this study is to compare the  
26 therapeutic efficacy and safety between acupotomy and acupuncture for CSR patients  
27 to provide evidence for clinical practice.

28  
29  
30  
31  
32  
33  
34 **Methods and analysis:** The following electronic databases will be searched: Web of  
35 Science, PubMed, Embase, Cochrane Library, China National Knowledge  
36 Infrastructure (CNKI), China Biology Medicine disc (CBM), Wanfang Database and  
37 Chinese Scientific Journal Database (VIP). The randomized controlled trials of  
38 acupotomy versus acupuncture with/without additional treatment for CSR will be  
39 searched in the databases from their inception to December 2018 by 2 researchers  
40 independently. Visual analog scale and symptom score will be assessed as the primary  
41 outcomes. The total effective rate, curative rate, adverse events, and amount of rescue  
42 medication used will be assessed as the secondary outcomes. The Review Manager  
43 5.3 will be used for meta-analysis and the evidence level will be assessed by using the  
44 method for Grading of Recommendations Assessment, Development, and Evaluation  
45 (GRADE). Continuous outcomes will be presented as the weighted mean difference  
46 (WMD) or standardized mean difference (SMD) with 95% confidence interval (CI),  
47 while dichotomous data will be expressed as relative risk (RR) with 95% CI. If the  
48  
49  
50  
51  
52  
53  
54  
55  
56  
57  
58  
59  
60

1  
2  
3 included studies have existing heterogeneity ( $P<0.05$ ), a random-effects model will be  
4 used. Otherwise, we will calculate using a fixed effects model.  
5  
6

7 **Ethics and dissemination:** The ethical approval is not required because no primary  
8 data are collected. This review will be published in a peer-reviewed journal and will  
9 be presented at an international academic conference for dissemination. Our results  
10 will provide clear evidence to determine whether acupotomy therapy is an effective  
11 and safe intervention for patients with CSR, and thus will be beneficial to patients,  
12 practitioners, and policymakers.  
13  
14  
15  
16  
17  
18

19  
20  
21 **PROSPERO registration number:** CRD42019117348.  
22

### 23 24 25 **Strengths and limitations of this study**

- 26 • This systematic review will comprehensively compare the therapeutic efficacy  
27 and safety between acupotomy and acupuncture for cervical spondylotic  
28 radiculopathy.  
29
- 30 • The study screening, data extraction, and quality assessment will be performed by  
31 two independent reviewers.  
32
- 33 • Different types of acupuncture and some of the reviewed trials with small sample  
34 sizes may cause considerable heterogeneity in this review. High- quality trials might  
35 be deficient to generate convincing conclusions.  
36  
37  
38  
39  
40  
41  
42  
43

44 **Abbreviations:** CSR = Cervical spondylotic radiculopathy, CBM = China Biology  
45 Medicine disc, CNKI = China National Knowledge Infrastructure, VIP = China  
46 Science and Technology Journal Database, RCTs = randomized controlled trials,  
47 VAS = Visual analog scale, GRADE = Grading of Recommendations Assessment,  
48 Development, and Evaluation, WMD = weighted mean difference, SMD =  
49 standardized mean difference, CI = confidence interval, RR = relative risk,  
50 PRISMA-P = Preferred Reporting Items for Systematic Reviews and Meta-analyses  
51 Protocols, NSAIDs = nonsteroidal anti-inflammatory drugs,  
52  
53  
54  
55  
56  
57  
58  
59  
60

1  
2  
3  
4 **Keywords:** acupotomy, acupuncture, cervical spondylotic radiculopathy, protocol,  
5 systematic review, meta-analysis  
6  
7  
8

9 # Corresponding authors  
10

11 Prof. Hongjia Zhao:  
12

13 Tel: (+86) 0591 86252627;  
14

15 Fax: (+86) 0591 86252627;  
16

17 Email: hongjiafz@163.com  
18  
19  
20  
21  
22  
23  
24  
25  
26  
27  
28  
29  
30  
31  
32  
33  
34  
35  
36  
37  
38  
39  
40  
41  
42  
43  
44  
45  
46  
47  
48  
49  
50  
51  
52  
53  
54  
55  
56  
57  
58  
59  
60

## 1. Introduction

Cervical spondylotic radiculopathy (CSR) is defined as neck pain in a radicular pattern in one or both upper extremities related to compression and/or irritation of one or more cervical nerve roots. The most common level of nerve root compression is C7, followed by C6. CSR, accounting for about 60 to 70 % of all cervical spondylosis, is the common and frequently-occurring disease in both middle-aged and elderly populations<sup>[1]</sup>. It has been reported that up to 80% of cervical spondylosis patients always complained of neck pain, which will become more and more serious over time. Due to social technology advances, lifestyle changes and the increase in staff members, the incidence of CSR tends to increase and the onset age of the patient gets younger year by year, which has seriously affected the patients' physical health and quality of life.

Management of CSR can be surgical or conservative. Conservative management is the initial treatment of choice for most patients, because surgery may be associated with adverse events and recurrence. Currently, many therapeutic interventions have been applied for the treatment of CSR, including nonsteroidal anti-inflammatory drugs (NSAIDs) <sup>[2]</sup>, epidural steroid injections <sup>[3]</sup>, acupuncture <sup>[4]</sup>, physical therapy <sup>[5]</sup>, and exercises <sup>[6, 7]</sup>. The main purpose of these treatments is to relieve pain, improve function, and enhance the quality of life. In clinical practice, acupotomy has also been widely used to treat cervical spondylosis, lumbar disc herniation, knee osteoarthritis and other diseases in China with satisfied efficacy, because of its effectiveness and low risk of complications <sup>[8-12]</sup>.

Acupotomy, also named needle-knife, originates from the "nine classical of needles" in Huang Di Nei Jing (*Huangdi's Internal Classic*) and was developed in China in 1976 by Zhu Hanzhang <sup>[13]</sup>. It is a new-style bladed needle that composed of a thick flat-head and a cylindrical body, which is suitable for alleviating the adhesion of a lesion. Acupotomy therapy is considered as a minimally invasive surgery of traditional Chinese medicine, combining Chinese acupuncture therapy and modern surgical principles <sup>[14]</sup>. In the treatment of CSR, the role of acupotomy is to remove

1  
2  
3  
4 attached tissues, recover the dynamic function of soft tissues, relieve nerve pressure,  
5 and promote Qi-blood circulation to ameliorate pain and numbness symptoms [10, 15].  
6  
7 Acupotomy has many benefits because it converts open surgery to closed surgery,  
8 thus reducing risk, time, and cost. This method only produces a small scar that will  
9 fade with time [11].  
10  
11  
12

13  
14 Acupotomy has the characteristics of both acupuncture and microinvasive operation.  
15 Both acupotomy and acupuncture have been widely used clinically to treat CSR in  
16 China with satisfied efficacy. However, there is no systematic review comparing the  
17 effectiveness of these two therapies in patients with CSR. It is worthy to critically  
18 review the evidence of the comparison of these two therapies to inform clinical  
19 practice. Herein, the aim of this study is to compare the therapeutic efficacy and  
20 safety between acupotomy and acupuncture on CSR to provide evidence for clinical  
21 practice.  
22  
23  
24  
25  
26  
27  
28  
29  
30  
31

## 32 **2. Methods**

### 33 **2.1. Study registration**

34 This systematic review and meta-analysis protocol was registered in PROSPERO  
35 (CRD42019117348) at <https://www.crd.york.ac.uk/PROSPERO/#myprospero>.  
36  
37  
38

### 39 **2.2. Inclusion criteria for study selection**

#### 40 **2.2.1. Type of study.**

41 We will estimate the research literature according to the criteria of the review  
42 objectives and participants, interventions, comparisons, outcomes (PICO).  
43 Randomized controlled trials (RCTs), comparing acupotomy against any form of  
44 acupuncture with/without additional treatment, will be included in this systematic  
45 review. We will include such studies if the expression “randomization” is mentioned.  
46 However, we will grade these studies as high in the “risk of bias assessment” if the  
47 detailed description on the randomization process is not provided. Furthermore, if an  
48 incorrect randomization method such as coin toss was used, the study will not be  
49 included. Moreover, blinding will not be considered because of the characteristics of  
50  
51  
52  
53  
54  
55  
56  
57  
58  
59  
60

1  
2  
3 acupuncture and acupotomy treatment. Additionally, the language of the publications  
4 will be limited to Chinese and English.  
5  
6

### 7 **2.2.2. Types of participants.**

8  
9 Patients of any gender or age or race or nationality with CSR received acupotomy or  
10 acupuncture therapy with/without additional treatment.  
11

- 12 1. In line with the diagnostic criteria of CSR.
- 13 2. Participants who have not undergone an invasive intervention.
- 14 3. No restriction on age.

15  
16 The exclusion criteria were shown as follows: (1) Replicated studies; (2) No definite  
17 diagnostic criteria of CSR; (3) Wrong interventions: these studies were excluded  
18 which used open surgery or acupotomy was manipulated in both groups; (4) Reviews  
19 or theory studies; (5) Animal experiments.  
20  
21

### 22 **2.2.3. Types of interventions.**

#### 23 **Experimental interventions**

24  
25 The treatment group will be treated with acupotomy (with/without additional  
26 treatment). No restrictions are imposed on times of treatment, frequency of treatment,  
27 and length of treatment period.  
28

#### 29 **Comparator interventions**

30  
31 The treatment with several types of acupuncture (with/without same additional  
32 treatment) will be included in this review as acupuncture, manual acupuncture,  
33 auricular acupuncture, scalp acupuncture, fire needling, warm needling, and  
34 electro-acupuncture, etc.  
35

36  
37 The procedure of acupuncture and acupotomy should be reported in full compliance  
38 with the standardized reporting methods such as the Standard of the Basic  
39 Manipulations of Acupotomy (ZJ/T D001-2014) and Standards for Reporting  
40 Interventions in Controlled Trials of Acupuncture (STRICTA).  
41  
42

### 43 **2.2.4. Types of outcome measures.**

44  
45 Changes in visual analog scale (VAS) and symptom score will be evaluated as  
46 primary outcomes. The total effective rate and the curative rate will be evaluated as  
47 secondary outcomes. The secondary outcome measures are as follows:  
48  
49  
50  
51  
52  
53  
54  
55  
56  
57  
58  
59  
60

1  
2  
3  
4 (1) Total effective rate and curative rate

5 The total effective rate and curative rate are non-validated outcome measures that are  
6 processed secondarily according to certain evaluation criteria such as clinical  
7 symptom improvement or the improvement rates of other quantified outcomes. In the  
8 assessment of the total effective rate, participants are generally classified as “cured”,  
9 “markedly improved”, “improved”, or “non-responder” after treatment. The total  
10 effective rate is calculated consistently using the following formula:  
11  
12  
13  
14  
15  
16

$$17 \quad \text{Total effective rate} = N_1 + N_2 + N_3 / N$$

$$18 \quad \text{Curative rate} = N_1 / N$$

19 where N1, N2, N3, and N are the number of patients who are cured, markedly  
20 improved, improved, and who comprise the sample size, respectively.  
21  
22

23 (2) The incidence of adverse events.

24 (3) The amount of rescue medication required.

25  
26  
27  
28  
29 **2.3. Data sources**

30 The main sources of information to be obtained in this study include electronic  
31 resource databases, trial registries, retroactive references, and different types of grey  
32 literature.  
33  
34  
35

36 Electronics searches:

37 The following electronic databases will be searched: Web of Science, PubMed,  
38 Embase, Cochrane Library, China National Knowledge Infrastructure (CNKI), China  
39 Biology Medicine disc (CBM), Wanfang Database and Chinese Scientific Journal  
40 Database (VIP). In addition, “gray literature” such as conference proceedings and  
41 theses will be allowed. Reference lists of the relevant literature and systematic  
42 reviews, as well as the tables of contents related to acupotomy versus acupuncture on  
43 CSR, will also be searched. RCTs of acupotomy versus acupuncture with/without  
44 additional treatment for CSR patients will be searched in the databases from their  
45 inception to December 2018 by two researchers independently.  
46  
47  
48  
49  
50  
51  
52  
53  
54

55 Searching for other resources:

56 Ambiguous literature will be investigated manually to avoid missing eligible trials.  
57  
58 Reference lists of identified publications will also be manually searched. In addition,  
59  
60



1  
2  
3  
4 the following journals published in Chinese will be searched as a supplement:  
5 *Chinese Acupuncture and Moxibustion* (1981–December 2018), *Acupuncture*  
6 *Research* (1976–December 2018), *World Journal of Acupuncture-moxibustion*  
7 (1991–December 2018), *Journal of Clinical Acupuncture and Moxibustion*  
8 (1985–December 2018), *Shanghai Journal of Acupuncture and Moxibustion*  
9 (1982–December 2018) and *Journal of Traditional Chinese Medicine*  
10 (1960–December 2018).

## 17 **2.4. Search strategy**

18  
19 The strategy will be created according to the Cochrane handbook guidelines. The  
20 established search strategy for PubMed was displayed, as follows:  
21

22  
23 **Mesh term #1:** ((acupotomy) OR (acupotome) OR (needle knife) OR (needle scalpel)  
24 OR (acupotomy) OR (miniscalpel acupuncture) OR (miniscalpel needle) OR  
25 (stiletto needle) OR (sword like needle) OR (Xiaozhendao)): ti, ab, kw  
26

27  
28 **Mesh term #2:** ((acupuncture) OR (manual acupuncture) OR (auricular acupuncture)  
29 OR (scalp acupuncture) OR (fire needling) OR (warm needling) OR  
30 (electro-acupuncture)): ti, ab, kw  
31

32  
33 **Mesh term #3:** ((cervical radiculopathy) OR (cervical spondylotic radiculopathy) OR  
34 (cervical spondylopathy) OR (cervical spondylosis) OR (neck pain) OR (neck  
35 syndrome): ti, ab, kw  
36

37  
38 **Mesh term #4:** ((clinical trials) OR (random control trials))  
39

40  
41 **#1 AND #2 AND #3 AND #4**  
42

43  
44 The equivalent search words will be used in Chinese databases.  
45

## 46 **2.5. Data collection and analysis**

### 47 **2.5.1. Selection of studies.**

48  
49 The researchers will import the retrieved literature into an EndNote library and  
50 eliminate duplicate data. Two review authors (Renpan Zhang and Anyang Lin)  
51 selected studies for eligibility and checked against the inclusion criteria independently.  
52 Any disagreement will be resolved by consensus or consultation with a third  
53 independent researcher (Hongjia Zhao). The selection process is illustrated in a  
54 PRISMA flow diagram (**Figure. 1**).  
55  
56  
57  
58  
59  
60

### 2.5.2. Data extraction and management.

Two review authors (Jing Liu and Zhongbiao Xiu) will independently use a standardized form for extracting data of the included articles. The following data were extracted: general information (e.g., title, authors, year and published country), details of study (e.g., design, inclusion and exclusion criteria, blinding, randomization and sample size), participant characteristics (e.g., age and number of subjects), description of interventions, types of outcomes assessed, adverse events, and other detailed information. If necessary, we will contact the corresponding authors of trials as much as possible for further information.

### 2.5.3. Assessment of risk of bias and reporting of study quality.

The Cochrane risk of bias tool will be applied to evaluate the quality and risk of bias in the ultimately included studies by two authors (Renpan Zhang and Anyang Lin) independently<sup>[16-17]</sup>. Risk of bias assessment categories will include the following: (1) random sequence generation; (2) allocation concealment; (3) blinding of participants; (4) blinding of outcome assessors; (5) completeness of outcome data; (6) selective outcome reporting; and (7) other biases. The assessments for each item will be graded as low risk, unclear risk, and high risk to evaluate several risks of bias that can occur in RCTs. In the case of other sources of bias, it was evaluated as “low” if the characteristics of participants in each group were reported to be statistically homogeneous at baseline, but was otherwise rated “high”. The results were presented as a risk of bias graph and risk of bias summary using the Cochrane Collaboration’s software program Review Manager (RevMan) version 5.3 for Windows (Copenhagen, The Nordic Cochrane Centre, the Cochrane Collaboration, 2012). If there is any disagreement take place, the arbiter (Hongjia Zhao) will do the final judge.

### 2.5.4. Measures of treatment effect.

Continuous outcomes will be presented as the mean difference (MD) for analysis, while dichotomous data will be expressed as relative risk (RR), both of them will be with 95% confidence intervals (CI)<sup>[18]</sup>. When the same outcome is measured in different ways, the standardized mean difference (SMD) with 95%CI will be selected to express the size of the intervention effect.

### 2.5.5. Dealing with missing data.

We will attempt to contact authors of included studies for missing or incomplete data by E-mail. However, If the missing data cannot be obtained, the study will be excluded from the analysis.

### 2.5.6. Assessment of heterogeneity.

Statistical heterogeneity will be detected by the  $I^2$  statistic and  $\chi^2$  test.  $P < 0.1$  of  $\chi^2$  test or  $I^2 > 50\%$  indicates the possibility of statistical heterogeneity among the studies. If the included studies have existing heterogeneity, a random-effect model will be used. Otherwise, we will use a fixed-effect model for calculation.

### 2.5.7. Assessment of reporting bias.

If more than 10 studies are included, visual asymmetry on the funnel plots will be used to assess the potential reporting biases. In addition, we will test asymmetry using the Harbord modified test for dichotomous outcomes and Egger test for continuous outcomes.

### 2.5.8. Data synthesis.

The Review Manager 5.3 will be employed for meta-analysis. When statistical heterogeneity is low among the results, the fixed-effects model will be used for the meta-analysis. However, there is considerable heterogeneity, the random-effects model will be performed to analyze the pooled effect estimates.

### 2.5.9. Subgroup analysis.

If there is significant heterogeneity in the included trials, we will conduct a subgroup analysis based on the acupotomy or acupuncture interventions with/without additional treatment, types of acupuncture (acupuncture, manual acupuncture, and electro-acupuncture, etc.) and different outcomes.

### 2.5.10. Sensitivity analysis.

A sensitivity analysis will be conducted to identify whether the review conclusions are robust according to the following criteria: missing data, sample size, heterogeneity qualities, and statistical model.

### 2.5.11. Grading the quality of evidence.

The evidence level will be assessed by using the method for Grading of

1  
2  
3  
4 Recommendations Assessment, Development, and Evaluation (GRADE) and  
5 classified into four possible ratings: very low, low, moderate, or high.

#### 6 7 **2.5.12. Patient and Public Involvement**

8  
9 Patients and or public were not involved because no primary data are collected.

### 10 11 12 13 **3. Discussion**

14  
15 The main symptoms of CSR include neck and shoulder pain, radicular pain or  
16 numbness in the upper extremities, weakening of grip strength, and sensory  
17 disturbances. Acupotomy, containing the characteristics of both acupuncture and  
18 micro-invasive operation, have been widely used clinically to treat CSR by peeling  
19 synechia, removing attached tissue, and relieve nerve pressure. Currently, there is  
20 limited evidence to determine whether acupotomy and acupuncture have a similar  
21 effect on relieving pain and improving other symptoms of CSR. Therefore, the  
22 comparisons of therapeutic efficacy and safety will be made between acupotomy and  
23 acupuncture with/without the same additional treatment is given to both groups. This  
24 systematic review and meta-analysis will provide high-quality evidence-based  
25 medicine to determine whether acupotomy therapy is an effective and safe  
26 intervention for patients with CSR.  
27  
28  
29  
30  
31  
32  
33  
34  
35  
36  
37  
38  
39  
40

#### 41 **Contributors**

42 Bin Chen and Hongjia Zhao designed the systematic review. The article was drafted  
43 by Bin Chen and Cai Zhang. Renpan Zhang, Anyang Lin, Jing Liu, and Zhongbiao  
44 Xiu will independently screen the potential studies, extract the data, assess the risk of  
45 bias and finish the data synthesis. Hongjia Zhao will arbitrate any disagreement and  
46 ensure that no errors occur during the review. All review authors critically reviewed,  
47 revised, and approved the subsequent and final version of the protocol.  
48  
49  
50  
51  
52  
53  
54  
55

#### 56 **Funding**

57  
58 This study was funded by the National Natural Science Foundation of China (Grant  
59 NO.81804175 and 81873315) and Fujian Provincial Department of Education  
60

1  
2  
3 Applied Discipline -- Clinical Medicine "Double First Class" Construction Project.  
4  
5  
6

7 **Competing interests**

8 None declared.  
9  
10  
11  
12

13 **Patient consent**

14 Not required.  
15  
16  
17  
18

19 **References**

20 <http://endnote.com/downloads/style/mdpi>

21  
22  
23 [1] Feng Y, Li WX, Zhu L, et al. Balance chiropractic therapy for cervical  
24 spondylotic radiculopathy: study protocol for a randomized controlled trial. *Trials*.  
25 2016, 17(1): 513.  
26  
27

28  
29 [2] Kartha S, Weisshaar CL, Philips BH, et al. Pre-treatment with Meloxicam  
30 Prevents the Spinal Inflammation and Oxidative Stress in DRG Neurons that  
31 Accompany Painful Cervical Radiculopathy. *Neuroscience*. 2018, 388: 393-404.  
32  
33

34 [3] Kim EJ, Chotai S, Schneider BJ, et al. Effect of Depression on Patient-Reported  
35 Outcomes Following Cervical Epidural Steroid Injection for Degenerative Spine  
36 Disease. *Pain Med*. 2018.  
37  
38

39 [4] Wei X, Wang S, Li J, et al. Complementary and Alternative Medicine for the  
40 Management of Cervical Radiculopathy: An Overview of Systematic Reviews. *Evid*  
41 *Based Complement Alternat Med*. 2015, 2015: 793649.  
42  
43

44 [5] Zhu L, Wei X, Wang S. Does cervical spine manipulation reduce pain in people  
45 with degenerative cervical radiculopathy? A systematic review of the evidence, and a  
46 meta-analysis. *Clin Rehabil*. 2016, 30(2): 145-155.  
47  
48

49 [6] Cheng CH, Tsai LC, Chung HC, et al. Exercise training for non-operative and  
50 post-operative patient with cervical radiculopathy: a literature review. *J Phys Ther Sci*.  
51 2015, 27(9): 3011-3018.  
52  
53

54 [7] Buyukturan B, Guclu-Gunduz A, Buyukturan O, et al. Cervical stability training  
55 with and without core stability training for patients with cervical disc herniation: A  
56  
57  
58  
59  
60

- 1  
2  
3  
4 randomized, single-blind study. *Eur J Pain*. 2017, 21(10): 1678-1687.
- 5  
6 [8] Liu F, Zhou F, Zhao M, et al. Acupotomy Therapy for Chronic Nonspecific Neck  
7 Pain: A Systematic Review and Meta-Analysis. *Evid Based Complement Alternat*  
8 *Med*. 2017, 2017: 6197308.
- 9  
10  
11 [9] Li S, Shen T, Liang Y, et al. Effects of Miniscalpel-Needle Release on Chronic  
12 Neck Pain: A Retrospective Analysis with 12-Month Follow-Up. *PLoS One*. 2015,  
13 10(8): e0137033.
- 14  
15  
16 [10] Kim SY, Kim E, Kwon O, et al. Effectiveness and Safety of Acupotomy for  
17 Lumbar Disc Herniation: A Randomized, Assessor-Blinded, Controlled Pilot Study.  
18 *Evid Based Complement Alternat Med*. 2018, 2018: 5871657.
- 19  
20  
21 [11] Kim HJ, Jeon JH, Kim YI. Clinical Effect of Acupotomy Combined with Korean  
22 Medicine: A Case Series of a Herniated Intervertebral Disc. *J Acupunct Meridian*  
23 *Stud*. 2016, 9(1): 31-41.
- 24  
25  
26 [12] Ding Y, Wang Y, Shi X, et al. Effect of ultrasound-guided acupotomy vs  
27 electro-acupuncture on knee osteoarthritis: a randomized controlled study. *J Tradit*  
28 *Chin Med*. 2016, 36(4): 450-455.
- 29  
30  
31 [13] Jeong JK, Kim YI, Kim E, et al. Effectiveness and safety of acupotomy for  
32 treating back and/or leg pain in patients with lumbar disc herniation: A study protocol  
33 for a multicenter, randomized, controlled, clinical trial. *Medicine (Baltimore)*. 2018,  
34 97(34): e11951.
- 35  
36  
37 [14] Guo C, Liu N, Li X, et al. Effect of acupotomy on nitric oxide synthase and  
38 beta-endorphin in third lumbar vertebrae transverse process syndrome model rats. *J*  
39 *Tradit Chin Med*. 2014, 34(2): 194-198.
- 40  
41  
42 [15] Jiang C, Li Y, Guo M, et al. Acupotomy therapy for lumbar disc herniation:  
43 Protocol for a systematic review and meta-analysis. *Medicine (Baltimore)*. 2018,  
44 97(40): e12624.
- 45  
46  
47 [16] The Cochrane Collaboration. Chapter 8: assessing risk of bias in included studies.  
48 In: Higgins J, Green S, eds, *Cochrane Handbook for Systematic Reviews of*  
49 *Interventions* Version 5.1.0, 2011. Available at: <http://handbook-5-1.cochrane.org/>.
- 50  
51  
52 [17] Chan-Young Kwon, Boram Lee, Gyu Tae Chang, et al. Efficacy of acupotomy  
53  
54  
55  
56  
57  
58  
59  
60

1  
2  
3  
4 for cerebral palsy A systematic review and meta-analysis. *Medicine*. 2019, 98(4):  
5 e14187.

6  
7 [18] Ye Y, Xiao LY, Liu YH, et al. Acupuncture for patients with vascular dementia:  
8 a systematic review protocol. *BMJ Open*. 2017, 7(12): e019066.  
9  
10  
11  
12  
13  
14  
15  
16  
17  
18  
19  
20  
21  
22  
23  
24  
25  
26  
27  
28  
29  
30  
31  
32  
33  
34  
35  
36  
37  
38  
39  
40  
41  
42  
43  
44  
45  
46  
47  
48  
49  
50  
51  
52  
53  
54  
55  
56  
57  
58  
59  
60

For peer review only

1  
2  
3  
4  
5  
6  
7  
8  
9  
10  
11  
12  
13  
14  
15  
16  
17  
18  
19  
20  
21  
22  
23  
24  
25  
26  
27  
28  
29  
30  
31  
32  
33  
34  
35  
36  
37  
38  
39  
40  
41  
42  
43  
44  
45  
46  
47  
48  
49  
50  
51  
52  
53  
54  
55  
56  
57  
58  
59  
60

**Figure Legends**

**Figure 1.** PRISMA flow diagram of study process

For peer review only



1  
2  
3  
4  
5  
6  
7  
8  
9  
10  
11  
12  
13  
14  
15  
16  
17  
18  
19  
20  
21  
22  
23  
24  
25  
26  
27  
28  
29  
30  
31  
32  
33  
34  
35  
36  
37  
38  
39  
40  
41  
42  
43  
44  
45  
46  
47  
48  
49  
50  
51  
52  
53  
54  
55  
56  
57  
58  
59  
60



Figure 1. PRISMA flow diagram of study process

188x225mm (300 x 300 DPI)

# BMJ Open

## Acupotomy versus acupuncture for cervical spondylotic radiculopathy: protocol of a systematic review and meta-analysis

|                                 |                                                                                                                                                                                                                                                                                                                                                                                                                                                                                                                                                                                                                                                                  |
|---------------------------------|------------------------------------------------------------------------------------------------------------------------------------------------------------------------------------------------------------------------------------------------------------------------------------------------------------------------------------------------------------------------------------------------------------------------------------------------------------------------------------------------------------------------------------------------------------------------------------------------------------------------------------------------------------------|
| Journal:                        | <i>BMJ Open</i>                                                                                                                                                                                                                                                                                                                                                                                                                                                                                                                                                                                                                                                  |
| Manuscript ID                   | bmjopen-2019-029052.R2                                                                                                                                                                                                                                                                                                                                                                                                                                                                                                                                                                                                                                           |
| Article Type:                   | Protocol                                                                                                                                                                                                                                                                                                                                                                                                                                                                                                                                                                                                                                                         |
| Date Submitted by the Author:   | 21-Jun-2019                                                                                                                                                                                                                                                                                                                                                                                                                                                                                                                                                                                                                                                      |
| Complete List of Authors:       | Chen, Bin; The Affiliated People's Hospital of Fujian University of Traditional Chinese Medicine, Department of Rehabilitation<br>Zhang, Cai; Fujian University of Traditional Chinese Medicine<br>Zhang, Ren-pan ; Fujian University of Traditional Chinese Medicine<br>Lin, An-yang; Fujian University of Traditional Chinese Medicine<br>Xiu, Zhong-biao; The Affiliated People's Hospital of Fujian University of Traditional Chinese Medicine<br>Liu, Jing; The Affiliated People's Hospital of Fujian University of Traditional Chinese Medicine<br>Zhao, Hong-jia ; The Affiliated People's Hospital of Fujian University of Traditional Chinese Medicine |
| <b>Primary Subject Heading</b>: | Complementary medicine                                                                                                                                                                                                                                                                                                                                                                                                                                                                                                                                                                                                                                           |
| Secondary Subject Heading:      | Rehabilitation medicine                                                                                                                                                                                                                                                                                                                                                                                                                                                                                                                                                                                                                                          |
| Keywords:                       | acupotomy, acupuncture, cervical spondylotic radiculopathy, protocol, systematic review, meta-analysis                                                                                                                                                                                                                                                                                                                                                                                                                                                                                                                                                           |
|                                 |                                                                                                                                                                                                                                                                                                                                                                                                                                                                                                                                                                                                                                                                  |

SCHOLARONE™  
Manuscripts

1  
2  
3  
4 **Acupotomy versus acupuncture for cervical spondylotic radiculopathy: protocol**  
5  
6 **of a systematic review and meta-analysis**

7 Bin Chen<sup>1</sup>, Cai Zhang<sup>2</sup>, Ren-Pan Zhang<sup>1,2</sup>, An-Yang Lin<sup>1,2</sup>, Zhong-Biao Xiu<sup>1</sup>,  
8  
9 Jing Liu<sup>1</sup>, Hong-Jia Zhao<sup>1</sup> #

10  
11 (1. Department of Rehabilitation, The Affiliated People's Hospital of Fujian  
12 University of Traditional Chinese Medicine, Fuzhou 350004, Fujian Province, China.

13  
14  
15 2. Fujian University of Traditional Chinese Medicine, Fuzhou 350122, Fujian  
16 Province, China.)

17  
18  
19 **Abstract**

20  
21 **Introduction:** Cervical spondylotic radiculopathy (CSR) is the most common pattern  
22 of cervical spondylosis, which is a serious and common degenerative disease. Both  
23 acupotomy and acupuncture have been widely used clinically to treat CSR in China  
24 with satisfied efficacy. However, there is no systematic review comparing the  
25 effectiveness of these two therapies. The aim of this study is to compare the  
26 therapeutic efficacy and safety between acupotomy and acupuncture for CSR patients  
27 to provide evidence for clinical practice.

28  
29  
30  
31  
32  
33  
34 **Methods and analysis:** The following electronic databases will be searched: Web of  
35 Science, PubMed, Embase, Cochrane Library, China National Knowledge  
36 Infrastructure (CNKI), China Biology Medicine disc (CBM), Wanfang Database and  
37 Chinese Scientific Journal Database (VIP). The randomized controlled trials of  
38 acupotomy versus acupuncture with/without additional treatment for CSR will be  
39 searched in the databases from their inception to December 2018 by 2 researchers  
40 independently. Visual analog scale, symptom score and neck disability index (NDI)  
41 will be assessed as the primary outcomes. The total effective rate, curative rate,  
42 adverse events, and amount of rescue medication used will be assessed as the  
43 secondary outcomes. The Review Manager 5.3 will be used for meta-analysis and the  
44 evidence level will be assessed by using the method for Grading of Recommendations  
45 Assessment, Development, and Evaluation (GRADE). Continuous outcomes will be  
46 presented as the weighted mean difference (WMD) or standardized mean difference  
47 (SMD) with 95% confidence interval (CI), while dichotomous data will be expressed  
48  
49  
50  
51  
52  
53  
54  
55  
56  
57  
58  
59  
60

1  
2  
3  
4 as relative risk (RR) with 95% CI. If the included studies have existing heterogeneity  
5 ( $P<0.05$ ), a random-effects model will be used. Otherwise, we will calculate using a  
6 fixed effects model.  
7

8  
9 **Ethics and dissemination:** The ethical approval is not required because no primary  
10 data are collected. This review will be published in a peer-reviewed journal and will  
11 be presented at an international academic conference for dissemination.  
12  
13  
14

15  
16  
17 **PROSPERO registration number:** CRD42019117348.  
18

### 19 20 21 **Strengths and limitations of this study**

- 22  
23 • This systematic review will comprehensively compare the therapeutic efficacy  
24 and safety between acupotomy and acupuncture for cervical spondylotic  
25 radiculopathy.  
26
- 27 • The study screening, data extraction, and quality assessment will be performed by  
28 two independent reviewers.  
29
- 30 • Different types of acupuncture and some of the reviewed trials with small sample  
31 sizes may cause considerable heterogeneity in this review. High- quality trials might  
32 be deficient to generate convincing conclusions.  
33  
34  
35  
36  
37  
38  
39

40  
41 **Abbreviations:** CSR = Cervical spondylotic radiculopathy, CBM = China Biology  
42 Medicine disc, CNKI = China National Knowledge Infrastructure, VIP = China  
43 Science and Technology Journal Database, RCTs = randomized controlled trials,  
44 VAS = Visual analog scale, GRADE = Grading of Recommendations Assessment,  
45 Development, and Evaluation, WMD = weighted mean difference, SMD =  
46 standardized mean difference, CI = confidence interval, RR = relative risk,  
47 PRISMA-P = Preferred Reporting Items for Systematic Reviews and Meta-analyses  
48 Protocols, NSAIDs = nonsteroidal anti-inflammatory drugs,  
49  
50  
51  
52  
53  
54  
55  
56  
57

58 **Keywords:** acupotomy, acupuncture, cervical spondylotic radiculopathy, protocol,  
59 systematic review, meta-analysis  
60

1  
2  
3  
4  
5 # Corresponding authors  
6

7 Prof. Hongjia Zhao:  
8

9 Tel: (+86) 0591 86252627;  
10

11 Fax: (+86) 0591 86252627;  
12

13 Email: hongjiafz@163.com  
14  
15  
16  
17  
18  
19  
20  
21  
22  
23  
24  
25  
26  
27  
28  
29  
30  
31  
32  
33  
34  
35  
36  
37  
38  
39  
40  
41  
42  
43  
44  
45  
46  
47  
48  
49  
50  
51  
52  
53  
54  
55  
56  
57  
58  
59  
60

For peer review only

## 1. Introduction

Cervical spondylotic radiculopathy (CSR) is defined as neck pain in a radicular pattern in one or both upper extremities related to compression and/or irritation of one or more cervical nerve roots. The most common level of nerve root compression is C7, followed by C6. CSR, accounting for about 60 to 70 % of all cervical spondylosis, is the common and frequently-occurring disease in both middle-aged and elderly populations<sup>[1]</sup>. It has been reported that up to 80% of cervical spondylosis patients always complained of neck pain, which will become more and more serious over time. Due to social technology advances, lifestyle changes and the increase in staff members, the incidence of CSR tends to increase and the onset age of the patient gets younger year by year, which has seriously affected the patients' physical health and quality of life.

Management of CSR can be surgical or conservative. Conservative management is the initial treatment of choice for most patients, because surgery may be associated with adverse events and recurrence. Currently, many therapeutic interventions have been applied for the treatment of CSR, including nonsteroidal anti-inflammatory drugs (NSAIDs) <sup>[2]</sup>, epidural steroid injections <sup>[3]</sup>, acupuncture <sup>[4]</sup>, physical therapy <sup>[5]</sup>, and exercises <sup>[6, 7]</sup>. The main purpose of these treatments is to relieve pain, improve function, and enhance the quality of life. In clinical practice, acupotomy has also been widely used to treat cervical spondylosis, lumbar disc herniation, knee osteoarthritis and other diseases in China with satisfied efficacy, because of its effectiveness and low risk of complications <sup>[8-12]</sup>.

Acupotomy, also named needle-knife, originates from the "nine classical of needles" in Huang Di Nei Jing (*Huangdi's Internal Classic*) and was developed in China in 1976 by Zhu Hanzhang <sup>[13]</sup>. It is a new-style bladed needle that composed of a thick flat-head and a cylindrical body, which is suitable for alleviating the adhesion of a lesion. Acupotomy therapy is considered as a minimally invasive surgery of traditional Chinese medicine, combining Chinese acupuncture therapy and modern surgical principles <sup>[14]</sup>. In the treatment of CSR, the role of acupotomy is to remove

1  
2  
3  
4 attached tissues, recover the dynamic function of soft tissues, relieve nerve pressure,  
5 and promote Qi-blood circulation to ameliorate pain and numbness symptoms [10, 15].  
6  
7 Acupotomy has many benefits because it converts open surgery to closed surgery,  
8 thus reducing risk, time, and cost. This method only produces a small scar that will  
9 fade with time [11].  
10  
11  
12

13  
14 Acupotomy has the characteristics of both acupuncture and microinvasive operation.  
15 Both acupotomy and acupuncture have been widely used clinically to treat CSR in  
16 China with satisfied efficacy. However, there is no systematic review comparing the  
17 effectiveness of these two therapies in patients with CSR. It is worthy to critically  
18 review the evidence of the comparison of these two therapies to inform clinical  
19 practice. Herein, the aim of this study is to compare the therapeutic efficacy and  
20 safety between acupotomy and acupuncture on CSR to provide evidence for clinical  
21 practice.  
22  
23  
24  
25  
26  
27  
28  
29  
30  
31

## 32 **2. Methods**

### 33 **2.1. Study registration**

34 This systematic review and meta-analysis protocol was registered in PROSPERO  
35 (CRD42019117348) at <https://www.crd.york.ac.uk/PROSPERO/#myprospero>.  
36  
37  
38

### 39 **2.2. Inclusion criteria for study selection**

#### 40 **2.2.1. Type of study.**

41 We will estimate the research literature according to the criteria of the review  
42 objectives and participants, interventions, comparisons, outcomes (PICO).  
43 Randomized controlled trials (RCTs), comparing acupotomy against any form of  
44 acupuncture with/without additional treatment, will be included in this systematic  
45 review. We will include such studies if the expression “randomization” is mentioned.  
46 However, we will grade these studies as high in the “risk of bias assessment” if the  
47 detailed description on the randomization process is not provided. Furthermore, if an  
48 incorrect randomization method such as coin toss was used, the study will not be  
49 included. Moreover, blinding will not be considered because of the characteristics of  
50  
51  
52  
53  
54  
55  
56  
57  
58  
59  
60

1  
2  
3  
4 acupuncture and acupotomy treatment. Additionally, the language of the publications  
5 will be limited to Chinese and English.  
6

### 7 **2.2.2. Types of participants.**

8  
9 Patients of any gender or age or race or nationality with CSR received acupotomy or  
10 acupuncture therapy with/without additional treatment.  
11

- 12 1. In line with the diagnostic criteria of CSR.
- 13 2. Participants who have not undergone an invasive intervention.
- 14 3. No restriction on age.

15  
16 The exclusion criteria were shown as follows: (1) Replicated studies; (2) No definite  
17 diagnostic criteria of CSR; (3) Wrong interventions: these studies were excluded  
18 which used open surgery or acupotomy was manipulated in both groups; (4) Reviews  
19 or theory studies; (5) Animal experiments.  
20

### 21 **2.2.3. Types of interventions.**

#### 22 **Experimental interventions**

23 The treatment group will be treated with acupotomy (with/without additional  
24 treatment). No restrictions are imposed on times of treatment, frequency of treatment,  
25 and length of treatment period.  
26

#### 27 **Comparator interventions**

28 The treatment with several types of acupuncture (with/without same additional  
29 treatment) will be included in this review as acupuncture, manual acupuncture,  
30 auricular acupuncture, scalp acupuncture, fire needling, warm needling, and  
31 electro-acupuncture, etc.  
32

33 The procedure of acupuncture and acupotomy should be reported in full compliance  
34 with the standardized reporting methods such as the Standard of the Basic  
35 Manipulations of Acupotomy (ZJ/T D001-2014) and Standards for Reporting  
36 Interventions in Controlled Trials of Acupuncture (STRICTA).  
37

### 38 **2.2.4. Types of outcome measures.**

39 Changes in visual analog scale (VAS), symptom score and neck disability index (NDI)  
40 will be evaluated as primary outcomes. The total effective rate and the curative rate  
41 will be evaluated as secondary outcomes. The secondary outcome measures are as  
42  
43  
44  
45  
46  
47  
48  
49  
50  
51  
52  
53  
54  
55  
56  
57  
58  
59  
60



1  
2  
3  
4 follows:

5 (1) Total effective rate and curative rate

6  
7 The total effective rate and curative rate are non-validated outcome measures that are  
8 processed secondarily according to certain evaluation criteria such as clinical  
9 symptom improvement or the improvement rates of other quantified outcomes. In the  
10 assessment of the total effective rate, participants are generally classified as “cured”,  
11 “markedly improved”, “improved”, or “non-responder” after treatment. The total  
12 effective rate is calculated consistently using the following formula:  
13  
14  
15  
16  
17  
18

$$19 \quad \textit{Total effective rate} = N_1 + N_2 + N_3 / N$$

$$20 \quad \textit{Curative rate} = N_1 / N$$

21  
22 where N1, N2, N3, and N are the number of patients who are cured, markedly  
23 improved, improved, and who comprise the sample size, respectively.  
24  
25

26 (2) The incidence of adverse events.

27 (3) The amount of rescue medication required.

### 28 29 30 31 **2.3. Data sources**

32 The main sources of information to be obtained in this study include electronic  
33 resource databases, trial registries, retroactive references, and different types of grey  
34 literature.  
35  
36  
37

38 Electronics searches:

39 The following electronic databases will be searched: Web of Science, PubMed,  
40 Embase, Cochrane Library, China National Knowledge Infrastructure (CNKI), China  
41 Biology Medicine disc (CBM), Wanfang Database and Chinese Scientific Journal  
42 Database (VIP). In addition, “gray literature” such as conference proceedings and  
43 theses will be allowed. Reference lists of the relevant literature and systematic  
44 reviews, as well as the tables of contents related to acupotomy versus acupuncture on  
45 CSR, will also be searched. RCTs of acupotomy versus acupuncture with/without  
46 additional treatment for CSR patients will be searched in the databases from their  
47 inception to December 2018 by two researchers independently.  
48  
49  
50  
51  
52  
53  
54  
55  
56  
57

58 Searching for other resources:

59 Ambiguous literature will be investigated manually to avoid missing eligible trials.  
60

Reference lists of identified publications will also be manually searched. In addition, the following journals published in Chinese will be searched as a supplement: *Chinese Acupuncture and Moxibustion* (1981–December 2018), *Acupuncture Research* (1976–December 2018), *World Journal of Acupuncture-moxibustion* (1991–December 2018), *Journal of Clinical Acupuncture and Moxibustion* (1985–December 2018), *Shanghai Journal of Acupuncture and Moxibustion* (1982–December 2018) and *Journal of Traditional Chinese Medicine* (1960–December 2018).

#### 2.4. Search strategy

The strategy will be created according to the Cochrane handbook guidelines. The established search strategy for PubMed was displayed, as follows:

**Mesh term #1:** ((acupotomy) OR (acupotome) OR (needle knife) OR (needle scalpel) OR (acupotomology) OR (miniscalpel acupuncture) OR (miniscalpel needle) OR (stiletto needle) OR (sword like needle) OR (Xiaozhendao)): ti, ab, kw

**Mesh term #2:** ((acupuncture) OR (manual acupuncture) OR (auricular acupuncture) OR (scalp acupuncture) OR (fire needling) OR (warm needling) OR (electro-acupuncture)): ti, ab, kw

**Mesh term #3:** ((cervical radiculopathy) OR (cervical spondylotic radiculopathy) OR (cervical spondylopathy) OR (cervical spondylosis) OR (neck pain) OR (neck syndrome)): ti, ab, kw

**Mesh term #4:** ((clinical trials) OR (random control trials))

**#1 AND #2 AND #3 AND #4**

The equivalent search words will be used in Chinese databases.

#### 2.5. Data collection and analysis

##### 2.5.1. Selection of studies.

The researchers will import the retrieved literature into an EndNote library and eliminate duplicate data. Two review authors (Renpan Zhang and Anyang Lin) selected studies for eligibility and checked against the inclusion criteria independently. Any disagreement will be resolved by consensus or consultation with a third independent researcher (Hongjia Zhao). The selection process is illustrated in a

1  
2  
3  
4 PRISMA flow diagram (**Figure. 1**).

#### 5 6 **2.5.2. Data extraction and management.**

7  
8 Two review authors (Jing Liu and Zhongbiao Xiu) will independently use a  
9  
10 standardized form for extracting data of the included articles. The following data were  
11  
12 extracted: general information (e.g., title, authors, year and published country), details  
13  
14 of study (e.g., design, inclusion and exclusion criteria, blinding, randomization and  
15  
16 sample size), participant characteristics (e.g., age and number of subjects), description  
17  
18 of interventions, types of outcomes assessed, adverse events, and other detailed  
19  
20 information. If necessary, we will contact the corresponding authors of trials as much  
21  
22 as possible for further information.

#### 23 24 **2.5.3. Assessment of risk of bias and reporting of study quality.**

25  
26 The Cochrane risk of bias tool will be applied to evaluate the quality and risk of bias  
27  
28 in the ultimately included studies by two authors (Renpan Zhang and Anyang Lin)  
29  
30 independently [16-17]. Risk of bias assessment categories will include the following: (1)  
31  
32 random sequence generation; (2) allocation concealment; (3) blinding of participants;  
33  
34 (4) blinding of outcome assessors; (5) completeness of outcome data; (6) selective  
35  
36 outcome reporting; and (7) other biases. The assessments for each item will be graded  
37  
38 as low risk, unclear risk, and high risk to evaluate several risks of bias that can occur  
39  
40 in RCTs. In the case of other sources of bias, it was evaluated as “low” if the  
41  
42 characteristics of participants in each group were reported to be statistically  
43  
44 homogeneous at baseline, but was otherwise rated “high”. The results were presented  
45  
46 as a risk of bias graph and risk of bias summary using the Cochrane Collaboration’s  
47  
48 software program Review Manager (RevMan) version 5.3 for Windows (Copenhagen,  
49  
50 The Nordic Cochrane Centre, the Cochrane Collaboration, 2012). If there is any  
51  
52 disagreement take place, the arbiter (Hongjia Zhao) will do the final judge.

#### 53 54 **2.5.4. Measures of treatment effect.**

55  
56 Continuous outcomes will be presented as the mean difference (MD) for analysis,  
57  
58 while dichotomous data will be expressed as relative risk (RR), both of them will be  
59  
60 with 95% confidence intervals (CI) [18]. When the same outcome is measured in  
different ways, the standardized mean difference (SMD) with 95%CI will be selected

1  
2  
3  
4 to express the size of the intervention effect.

#### 5 6 **2.5.5. Dealing with missing data.**

7 We will attempt to contact authors of included studies for missing or incomplete data  
8 by E-mail. However, If the missing data cannot be obtained, the study will be  
9 excluded from the analysis.  
10  
11

#### 12 13 **2.5.6. Assessment of heterogeneity.**

14 Statistical heterogeneity will be detected by the  $I^2$  statistic and  $\chi^2$  test.  $P < 0.1$  of  $\chi^2$   
15 test or  $I^2 > 50\%$  indicates the possibility of statistical heterogeneity among the studies.  
16 If the included studies have existing heterogeneity, a random-effect model will be  
17 used. Otherwise, we will use a fixed-effect model for calculation.  
18  
19

#### 20 21 **2.5.7. Assessment of reporting bias.**

22 If more than 10 studies are included, visual asymmetry on the funnel plots will be  
23 used to assess the potential reporting biases. In addition, we will test asymmetry using  
24 the Harbord modified test for dichotomous outcomes and Egger test for continuous  
25 outcomes.  
26  
27

#### 28 29 **2.5.8. Data synthesis.**

30 The Review Manager 5.3 will be employed for meta-analysis. When statistical  
31 heterogeneity is low among the results, the fixed-effects model will be used for the  
32 meta-analysis. However, there is considerable heterogeneity, the random-effects  
33 model will be performed to analyze the pooled effect estimates.  
34  
35

#### 36 37 **2.5.9. Subgroup analysis.**

38 If there is significant heterogeneity in the included trials, we will conduct a subgroup  
39 analysis based on the acupotomy or acupuncture interventions with/without additional  
40 treatment, types of acupuncture (acupuncture, manual acupuncture, and  
41 electro-acupuncture, etc.) and different outcomes.  
42  
43

#### 44 45 **2.5.10. Sensitivity analysis.**

46 A sensitivity analysis will be conducted to identify whether the review conclusions  
47 are robust according to the following criteria: missing data, sample size, heterogeneity  
48 qualities, and statistical model.  
49  
50

#### 51 52 **2.5.11. Grading the quality of evidence.**

1  
2  
3  
4 The evidence level will be assessed by using the method for Grading of  
5 Recommendations Assessment, Development, and Evaluation (GRADE) and  
6 classified into four possible ratings: very low, low, moderate, or high.  
7  
8

### 9 10 **2.5.12. Patient and Public Involvement**

11 Patients and or public were not involved because no primary data are collected.  
12  
13

14  
15 **Ethics and dissemination:** The ethical approval will not be needed because no  
16 primary data are collected. Our results will provide clear evidence to determine  
17 whether acupotomy therapy is an effective and safe intervention for patients with  
18 CSR, and thus will be beneficial to patients, practitioners, and policymakers. This  
19 review will be published in a peer-reviewed journal and will be presented at an  
20 international academic conference for dissemination.  
21  
22  
23  
24  
25  
26  
27  
28

## 29 **3. Discussion**

30 The main symptoms of CSR include neck and shoulder pain, radicular pain or  
31 numbness in the upper extremities, weakening of grip strength, and sensory  
32 disturbances. Acupotomy, containing the characteristics of both acupuncture and  
33 micro-invasive operation, have been widely used clinically to treat CSR by peeling  
34 synechia, removing attached tissue, and relieve nerve pressure. Currently, there is  
35 limited evidence to determine whether acupotomy and acupuncture have a similar  
36 effect on relieving pain and improving other symptoms of CSR. Therefore, the  
37 comparisons of therapeutic efficacy and safety will be made between acupotomy and  
38 acupuncture with/without the same additional treatment is given to both groups. This  
39 systematic review and meta-analysis will provide high-quality evidence-based  
40 medicine to determine whether acupotomy therapy is an effective and safe  
41 intervention for patients with CSR.  
42  
43  
44  
45  
46  
47  
48  
49  
50  
51  
52  
53  
54  
55

### 56 **Contributors**

57  
58 Bin Chen and Hongjia Zhao designed the systematic review. The article was drafted  
59 by Bin Chen and Cai Zhang. Renpan Zhang, Anyang Lin, Jing Liu, and Zhongbiao  
60

1  
2  
3  
4 Xiu will independently screen the potential studies, extract the data, assess the risk of  
5 bias and finish the data synthesis. Hongjia Zhao will arbitrate any disagreement and  
6 ensure that no errors occur during the review. All review authors critically reviewed,  
7 revised, and approved the subsequent and final version of the protocol.  
8  
9  
10  
11  
12

### 13 **Funding**

14  
15 This study was funded by the National Natural Science Foundation of China (Grant  
16 NO.81804175 and 81873315) and Fujian Provincial Department of Education  
17 Applied Discipline -- Clinical Medicine "Double First Class" Construction Project.  
18  
19  
20  
21  
22

### 23 **Competing interests**

24  
25 None declared.  
26  
27  
28

### 29 **Patient consent**

30  
31 Not required.  
32  
33  
34

### 35 **References**

36  
37 <http://endnote.com/downloads/style/mdpi>

- 38  
39 [1] Feng Y, Li WX, Zhu L, et al. Balance chiropractic therapy for cervical  
40 spondylotic radiculopathy: study protocol for a randomized controlled trial. *Trials*.  
41 2016, 17(1): 513.  
42  
43 [2] Kartha S, Weisshaar CL, Philips BH, et al. Pre-treatment with Meloxicam  
44 Prevents the Spinal Inflammation and Oxidative Stress in DRG Neurons that  
45 Accompany Painful Cervical Radiculopathy. *Neuroscience*. 2018, 388: 393-404.  
46  
47 [3] Kim EJ, Chotai S, Schneider BJ, et al. Effect of Depression on Patient-Reported  
48 Outcomes Following Cervical Epidural Steroid Injection for Degenerative Spine  
49 Disease. *Pain Med*. 2018.  
50  
51 [4] Wei X, Wang S, Li J, et al. Complementary and Alternative Medicine for the  
52 Management of Cervical Radiculopathy: An Overview of Systematic Reviews. *Evid*  
53  
54  
55  
56  
57  
58  
59  
60  
Based Complement Alternat Med. 2015, 2015: 793649.

- 1  
2  
3  
4 [5] Zhu L, Wei X, Wang S. Does cervical spine manipulation reduce pain in people  
5 with degenerative cervical radiculopathy? A systematic review of the evidence, and a  
6 meta-analysis. *Clin Rehabil.* 2016, 30(2): 145-155.  
7  
8  
9 [6] Cheng CH, Tsai LC, Chung HC, et al. Exercise training for non-operative and  
10 post-operative patient with cervical radiculopathy: a literature review. *J Phys Ther Sci.*  
11 2015, 27(9): 3011-3018.  
12  
13  
14 [7] Buyukturan B, Guclu-Gunduz A, Buyukturan O, et al. Cervical stability training  
15 with and without core stability training for patients with cervical disc herniation: A  
16 randomized, single-blind study. *Eur J Pain.* 2017, 21(10): 1678-1687.  
17  
18  
19 [8] Liu F, Zhou F, Zhao M, et al. Acupotomy Therapy for Chronic Nonspecific Neck  
20 Pain: A Systematic Review and Meta-Analysis. *Evid Based Complement Alternat*  
21 *Med.* 2017, 2017: 6197308.  
22  
23  
24 [9] Li S, Shen T, Liang Y, et al. Effects of Miniscalpel-Needle Release on Chronic  
25 Neck Pain: A Retrospective Analysis with 12-Month Follow-Up. *PLoS One.* 2015,  
26 10(8): e0137033.  
27  
28  
29 [10] Kim SY, Kim E, Kwon O, et al. Effectiveness and Safety of Acupotomy for  
30 Lumbar Disc Herniation: A Randomized, Assessor-Blinded, Controlled Pilot Study.  
31 *Evid Based Complement Alternat Med.* 2018, 2018: 5871657.  
32  
33  
34 [11] Kim HJ, Jeon JH, Kim YI. Clinical Effect of Acupotomy Combined with Korean  
35 Medicine: A Case Series of a Herniated Intervertebral Disc. *J Acupunct Meridian*  
36 *Stud.* 2016, 9(1): 31-41.  
37  
38  
39 [12] Ding Y, Wang Y, Shi X, et al. Effect of ultrasound-guided acupotomy vs  
40 electro-acupuncture on knee osteoarthritis: a randomized controlled study. *J Tradit*  
41 *Chin Med.* 2016, 36(4): 450-455.  
42  
43  
44 [13] Jeong JK, Kim YI, Kim E, et al. Effectiveness and safety of acupotomy for  
45 treating back and/or leg pain in patients with lumbar disc herniation: A study protocol  
46 for a multicenter, randomized, controlled, clinical trial. *Medicine (Baltimore).* 2018,  
47 97(34): e11951.  
48  
49  
50 [14] Guo C, Liu N, Li X, et al. Effect of acupotomy on nitric oxide synthase and  
51 beta-endorphin in third lumbar vertebrae transverse process syndrome model rats. *J*  
52  
53  
54  
55  
56  
57  
58  
59  
60

1  
2  
3  
4 Tradit Chin Med. 2014, 34(2): 194-198.

5 [15] Jiang C, Li Y, Guo M, et al. Acupotomy therapy for lumbar disc herniation:  
6 Protocol for a systematic review and meta-analysis. *Medicine (Baltimore)*. 2018,  
7 97(40): e12624.  
8  
9  
10

11 [16] The Cochrane Collaboration. Chapter 8: assessing risk of bias in included studies.  
12 In: Higgins J, Green S, eds, *Cochrane Handbook for Systematic Reviews of*  
13 *Interventions* Version 5.1.0, 2011. Available at: <http://handbook-5-1.cochrane.org/>.  
14  
15  
16

17 [17] Chan-Young Kwon, Boram Lee, Gyu Tae Chang, et al. Efficacy of acupotomy  
18 for cerebral palsy A systematic review and meta-analysis. *Medicine*. 2019, 98(4):  
19 e14187.  
20  
21  
22

23 [18] Ye Y, Xiao LY, Liu YH, et al. Acupuncture for patients with vascular dementia:  
24 a systematic review protocol. *BMJ Open*. 2017, 7(12): e019066.  
25  
26  
27  
28  
29  
30  
31  
32  
33  
34  
35  
36  
37  
38  
39  
40  
41  
42  
43  
44  
45  
46  
47  
48  
49  
50  
51  
52  
53  
54  
55  
56  
57  
58  
59  
60



1  
2  
3  
4  
5  
6  
7  
8  
9  
10  
11  
12  
13  
14  
15  
16  
17  
18  
19  
20  
21  
22  
23  
24  
25  
26  
27  
28  
29  
30  
31  
32  
33  
34  
35  
36  
37  
38  
39  
40  
41  
42  
43  
44  
45  
46  
47  
48  
49  
50  
51  
52  
53  
54  
55  
56  
57  
58  
59  
60

**Figure Legends**

**Figure 1.** PRISMA flow diagram of study process

For peer review only

1  
2  
3  
4  
5  
6  
7  
8  
9  
10  
11  
12  
13  
14  
15  
16  
17  
18  
19  
20  
21  
22  
23  
24  
25  
26  
27  
28  
29  
30  
31  
32  
33  
34  
35  
36  
37  
38  
39  
40  
41  
42  
43  
44  
45  
46  
47  
48  
49  
50  
51  
52  
53  
54  
55  
56  
57  
58  
59  
60

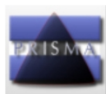

**PRISMA flow diagram of study process**

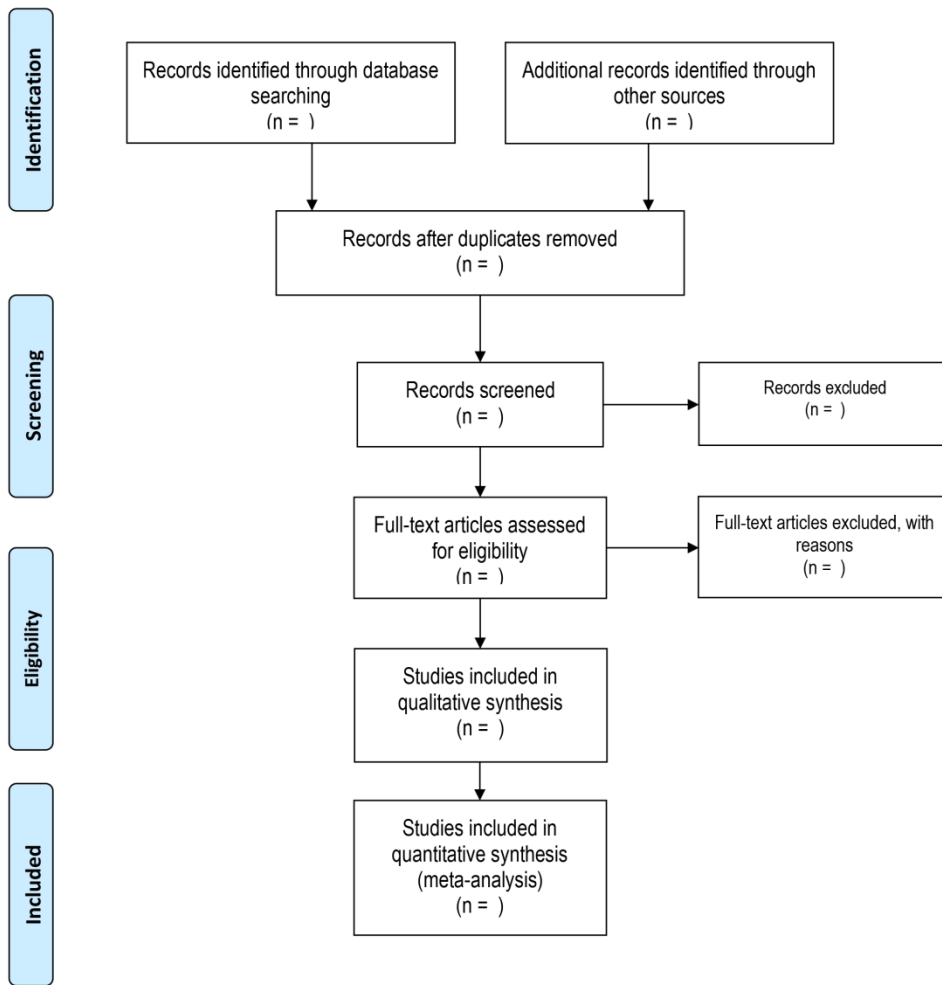

Figure 1. PRISMA flow diagram of study process

188x225mm (300 x 300 DPI)
